# Supplementary material for: Assembly and activation of the Hippo signalome by FAT1 tumor suppressor
Source: PubMed Central journal article supplement (PMC6037762; doi:10.1038/s41467-018-04590-1), 2018-07-09
Supplement: 41467_2018_4590_MOESM3_ESM.pdf [file 41467_2018_4590_MOESM3_ESM.pdf]

## **Description of Additional Supplementary Files**

**File Name:** Supplementary Data 1

**Description:** Differentially expressed genes in FAT normal versus FAT mutant HNSCC samples from TCGA.

**File Name:** Supplementary Data 2

**Description:** Results from Transfac and Jaspar PWMs Enrichr analysis.

**File Name:** Supplementary Data 3

**Description:** Sequences of oligonucleotides used.

**File Name:** Supplementary Data 4

**Description:** Cancer abbreviations and number of cases included in the Hippo members and FAT1 analysis in Figure 1.
